# Supplementary material for: Formation domain of SDA-free Y faujasite small crystals
Source: Royal Society of Chemistry journal article supplement (doi:10.1039/c7nj02200j), 2017-01-01
Supplement: c7nj02200j1.pdf [file c7nj02200j1.pdf]

## Formation Domain of SDA-Free Y Faujasite Small Crystals

M. Borel,<sup>ab</sup> M. Dodin,<sup>b</sup> T.J Daou,<sup>a,\*</sup> N. Bats,<sup>b</sup> and J. Patarin<sup>a</sup>

<sup>a</sup>Université de Strasbourg (UNISTRA), Université de Haute Alsace (UHA). CNRS, Axe Matériaux à Porosité Contrôlée (MPC), Institut de Science des Matériaux de Mulhouse (IS2M), UMR 7361, 68093 Mulhouse, France

<sup>b</sup>IFP Energies nouvelles, Rond-Point de l'échangeur de Solaize, 69360 Solaize, France

\* Corresponding author: [jean.daou@uha.fr](mailto:jean.daou@uha.fr), Telephone number: +33 3 89 33 67 39, Fax number: +33 3 89 33 68 85

Table S1: This table represents the calculated diagram (SiO<sub>2</sub>-H<sub>2</sub>O-Na<sub>2</sub>O) coordinates for each sample, their corresponding starting molar gel composition and obtained phase nature. The Al<sub>2</sub>O<sub>3</sub> molar composition of the gel was kept unchanged at 0.2. SiO<sub>2</sub>/Na<sub>2</sub>O molar ratio varies from 0.3 to 3.8, SiO<sub>2</sub>/Al<sub>2</sub>O<sub>3</sub> molar ratio varies from 1.5 to 47 and Na<sub>2</sub>O/H<sub>2</sub>O molar ratio varies from 0.005 to 0.1.

| Sample name                  | Diagram coordinates |                   |                  | Molar gel composition |                   |                  | Gel SiO <sub>2</sub> /Na <sub>2</sub> O<br>molar ratio | Gel SiO <sub>2</sub> /Al <sub>2</sub> O <sub>3</sub><br>molar ratio | Gel Na <sub>2</sub> O/H <sub>2</sub> O<br>molar ratio | Obtained phase<br>nature |
|------------------------------|---------------------|-------------------|------------------|-----------------------|-------------------|------------------|--------------------------------------------------------|---------------------------------------------------------------------|-------------------------------------------------------|--------------------------|
|                              | SiO <sub>2</sub>    | Na <sub>2</sub> O | H <sub>2</sub> O | SiO <sub>2</sub>      | Na <sub>2</sub> O | H <sub>2</sub> O |                                                        |                                                                     |                                                       |                          |
| 9.4-4.95-225H <sub>2</sub> O | 0.0393              | 0.0207            | 0.9400           | 9.4                   | 4.95              | 225              | 1.9                                                    | 47                                                                  | 0.022                                                 | FAU Y+amorphous          |
| 9.4-4.95-210H <sub>2</sub> O | 0.0419              | 0.0221            | 0.9360           | 9.4                   | 4.95              | 210              | 1.9                                                    | 47                                                                  | 0.024                                                 | FAU Y+amorphous          |
| 9.4-4.95-195H <sub>2</sub> O | 0.0449              | 0.0236            | 0.9315           | 9.4                   | 4.95              | 195              | 1.9                                                    | 47                                                                  | 0.025                                                 | FAU Y+amorphous          |
| 9.4-4.95-180H <sub>2</sub> O | 0.0484              | 0.0255            | 0.9261           | 9.4                   | 4.95              | 180              | 1.9                                                    | 47                                                                  | 0.028                                                 | FAU Y                    |
| 9.4-4.95-165H <sub>2</sub> O | 0.0524              | 0.0276            | 0.9200           | 9.4                   | 4.95              | 165              | 19                                                     | 47                                                                  | 0.03                                                  | FAU Y                    |
| 9.4-4.95-150H <sub>2</sub> O | 0.0572              | 0.0301            | 0.9127           | 9.4                   | 4.95              | 150              | 1.9                                                    | 47                                                                  | 0.033                                                 | FAU Y                    |

|                              |        |        |        |     |      |     |     |      |       |                         |
|------------------------------|--------|--------|--------|-----|------|-----|-----|------|-------|-------------------------|
| 9.4-4.95-135H <sub>2</sub> O | 0.0629 | 0.0331 | 0.9040 | 9.4 | 4.95 | 135 | 1.9 | 47   | 0.037 | FAU Y                   |
| 9.4-4.95-120H <sub>2</sub> O | 0.0700 | 0.0368 | 0.8932 | 9.4 | 4.95 | 120 | 1.9 | 47   | 0.041 | FAU Y                   |
| 9.4-4.95-105H <sub>2</sub> O | 0.0788 | 0.0415 | 0.8797 | 9.4 | 4.95 | 105 | 1.9 | 47   | 0.047 | FAU Y                   |
| 9.4-4.95-90H <sub>2</sub> O  | 0.0901 | 0.0474 | 0.8625 | 9.4 | 4.95 | 90  | 1.9 | 47   | 0.055 | FAU Y                   |
| 9.4-4.95-80H <sub>2</sub> O  | 0.0996 | 0.0525 | 0.8479 | 9.4 | 4.95 | 80  | 1.9 | 47   | 0.062 | No precipitate          |
| 9.4-4.95-75H <sub>2</sub> O  | 0.1052 | 0.0554 | 0.8394 | 9.4 | 4.95 | 75  | 1.9 | 47   | 0.066 | No precipitate          |
| 9.4-2.48-75H <sub>2</sub> O  | 0.1082 | 0.0285 | 0.8633 | 9.4 | 2.48 | 75  | 3.8 | 47   | 0.033 | amorphous               |
| 0.3-0.3-64H <sub>2</sub> O   | 0.0062 | 0.0062 | 0.9876 | 0.3 | 0.3  | 64  | 1   | 1.5  | 0.005 | amorphous               |
| 0.6-0.6-64H <sub>2</sub> O   | 0.0087 | 0.0087 | 0.9826 | 0.6 | 0.6  | 64  | 1   | 3    | 0.009 | LTA                     |
| 1.0-1.0-63H <sub>2</sub> O   | 0.0148 | 0.0148 | 0.9704 | 1.0 | 1.0  | 63  | 1   | 5    | 0.016 | FAU Y+20%LTA            |
| 1.3-1.3-62H <sub>2</sub> O   | 0.0200 | 0.0200 | 0.9600 | 1.3 | 1.3  | 62  | 1   | 6.5  | 0.021 | FAU Y                   |
| 1.6-1.6-62H <sub>2</sub> O   | 0.0247 | 0.0247 | 0.9506 | 1.6 | 1.6  | 62  | 1   | 8    | 0.026 | FAU Y                   |
| 0.7-2.2-62H <sub>2</sub> O   | 0.0108 | 0.0339 | 0.9553 | 0.7 | 2.2  | 62  | 0.3 | 3.5  | 0.035 | FAU X*+50%LTA           |
| 0.8-1.6-62H <sub>2</sub> O   | 0.0123 | 0.0247 | 0.9630 | 0.8 | 1.6  | 62  | 0.5 | 4    | 0.026 | FAU Y+15%LTA            |
| 1.2-2.0-62H <sub>2</sub> O   | 0.0185 | 0.0308 | 0.9507 | 1.2 | 2.0  | 62  | 0.6 | 6    | 0.032 | Intergrowth FAU X/EMC-2 |
| 2.1-1.8-61H <sub>2</sub> O   | 0.0324 | 0.0277 | 0.9399 | 2.1 | 1.8  | 61  | 1.2 | 10.5 | 0.030 | FAU Y                   |
| 1.0-2.6-61H <sub>2</sub> O   | 0.0176 | 0.0401 | 0.9423 | 1.0 | 2.6  | 61  | 0.4 | 5    | 0.043 | FAU X*+10%LTA+10%SOD    |

|                            |        |        |        |     |     |    |      |      |       |                         |
|----------------------------|--------|--------|--------|-----|-----|----|------|------|-------|-------------------------|
| 1.8-2.3-61H <sub>2</sub> O | 0.0277 | 0.0354 | 0.9369 | 1.8 | 2.3 | 61 | 0.8  | 9    | 0.038 | Intergrowth FAU X/EMC-2 |
| 2.3-2.6-60H <sub>2</sub> O | 0.0354 | 0.0400 | 0.9246 | 2.3 | 2.6 | 60 | 0.9  | 11.5 | 0.043 | FAU Y*+εGIS             |
| 2.5-1.9-60H <sub>2</sub> O | 0.0398 | 0.0318 | 0.9284 | 2.5 | 1.9 | 60 | 1.3  | 12.5 | 0.032 | FAU Y                   |
| 2.9-2.3-60H <sub>2</sub> O | 0.0446 | 0.0354 | 0.9200 | 2.9 | 2.3 | 60 | 1.3  | 14.5 | 0.038 | FAU Y                   |
| 3.6-1.0-60H <sub>2</sub> O | 0.0555 | 0.0154 | 0.9291 | 3.6 | 1.0 | 60 | 3.6  | 18   | 0.017 | amorphous               |
| 1.7-2.9-60H <sub>2</sub> O | 0.0262 | 0.0447 | 0.9291 | 1.7 | 2.9 | 60 | 0.6  | 8.5  | 0.048 | FAU X*+10%SOD           |
| 2.9-2.9-59H <sub>2</sub> O | 0.0447 | 0.0447 | 0.9106 | 2.9 | 2.9 | 59 | 1    | 14.5 | 0.049 | FAU Y*+20%GIS           |
| 3.5-2.3-59H <sub>2</sub> O | 0.0539 | 0.0354 | 0.9107 | 3.5 | 2.3 | 59 | 1.5  | 17.5 | 0.039 | FAU Y                   |
| 3.6-2.9-58H <sub>2</sub> O | 0.0555 | 0.0447 | 0.8998 | 3.6 | 2.9 | 58 | 1.2  | 18   | 0.05  | FAU Y*+10%GIS           |
| 4.0-3.2-58H <sub>2</sub> O | 0.0616 | 0.0493 | 0.8891 | 4.0 | 3.2 | 58 | 1.25 | 20   | 0.055 | FAU Y*+15%GIS           |
| 4.2-2.8-58H <sub>2</sub> O | 0.0647 | 0.0431 | 0.8922 | 4.2 | 2.8 | 58 | 1.5  | 21   | 0.048 | FAU Y                   |
| 4.9-1.9-58H <sub>2</sub> O | 0.0762 | 0.0300 | 0.8938 | 4.9 | 1.9 | 58 | 2.6  | 24.5 | 0.033 | amorphous               |
| 4.1-3.6-57H <sub>2</sub> O | 0.0632 | 0.0555 | 0.8813 | 4.1 | 3.6 | 57 | 1.1  | 20.5 | 0.063 | FAU Y*+30%GIS+20%RHO    |
| 4.5-3.7-57H <sub>2</sub> O | 0.0693 | 0.0570 | 0.8737 | 4.5 | 3.7 | 57 | 1.2  | 22.5 | 0.065 | FAU Y*+20%GIS+15%RHO    |
| 4.6-3.2-57H <sub>2</sub> O | 0.0709 | 0.0493 | 0.8798 | 4.6 | 3.2 | 57 | 1.4  | 23   | 0.056 | FAU Y+10%GIS            |
| 5.2-3.2-56H <sub>2</sub> O | 0.0801 | 0.0493 | 0.8706 | 5.2 | 3.2 | 56 | 1.6  | 26   | 0.057 | FAU Y+5%GIS             |
| 5.2-3.9-56H <sub>2</sub> O | 0.0800 | 0.0600 | 0.8600 | 5.2 | 3.9 | 56 | 1.3  | 26   | 0.070 | FAU Y+40%GIS+25%RHO     |

|                             |        |        |        |     |      |    |     |    |       |                     |
|-----------------------------|--------|--------|--------|-----|------|----|-----|----|-------|---------------------|
| 6.2-2.3-56H <sub>2</sub> O  | 0.1016 | 0.0354 | 0.8630 | 6.2 | 2.3  | 56 | 2.7 | 31 | 0.041 | amorphous           |
| 5.8-3.6-55H <sub>2</sub> O  | 0.0913 | 0.0592 | 0.8495 | 5.8 | 3.6  | 55 | 1.6 | 29 | 0.065 | FAU<br>Y+5%GIS+εRHO |
| 9.4-4.95-50H <sub>2</sub> O | 0.1461 | 0.0769 | 0.7770 | 9.4 | 4.95 | 50 | 1.9 | 47 | 0.099 | No precipitate      |

\*with EMC-2 intergrowth

Percentages were determined by X-ray diffraction

Pink: zone 1 of the ternary phase diagram

Blue: zone 2 of the ternary phase diagram

Green: zone 3 of the ternary phase diagram

### <sup>27</sup>Al MAS NMR spectroscopy

<sup>27</sup>Al ( $I = 5/2$ ) magic angle spinning nuclear magnetic resonance (MAS-NMR) was carried out with a Bruker Avance II 400 spectrometer operating at  $B_0 = 9.4$  T (Larmor frequency  $\nu_0 = 104.2$  MHz) equipped with a Bruker 4 mm double channel probe. Samples were spun at 12 kHz, and free induction decays (FID) were collected with a  $\pi/12$  rf pulse ( $0.5 \mu\text{s}$ ) and a recycle delay of 1 s. Measurements were carried out with  $[\text{Al}(\text{H}_2\text{O})_6]^{3+}$  as external standard reference.

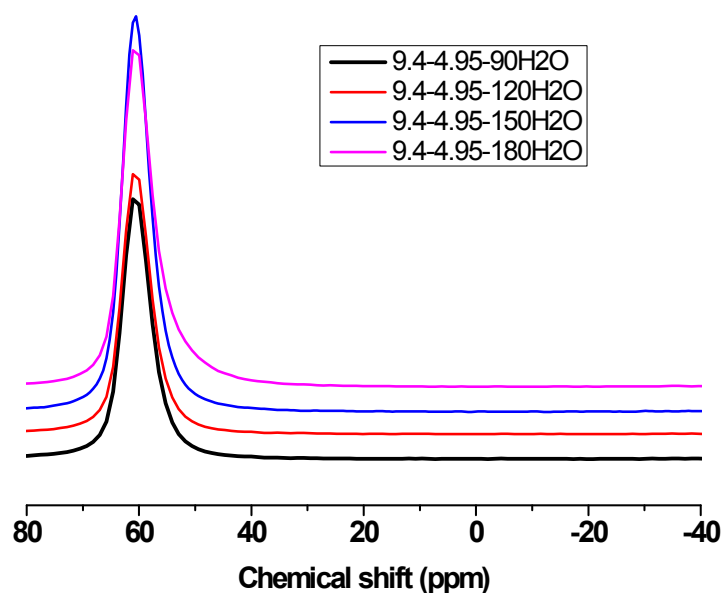

Figure S1. <sup>27</sup>Al MAS NMR spectra of the samples obtained from starting gels with the following molar compositions: 9.4 SiO<sub>2</sub>: 0.2 Al<sub>2</sub>O<sub>3</sub>: 4.95 Na<sub>2</sub>O: 90/120/150/180 H<sub>2</sub>O.

---

### <sup>29</sup>Si MAS NMR spectroscopy

<sup>29</sup>Si MAS NMR spectroscopy which give reliable results concerning the Si/Al molar ratio of the completely crystallized materials, was also used to confirm the results obtained from XRD refinement and XRF. The framework Si/Al molar ratio was determined using the equation  $(\text{Si}/\text{Al}) = \frac{\sum_{n=0}^4 I(\text{Si}(n\text{Al}))}{\sum_{n=0}^4 n/4 I}$ , where  $I(\text{Si}(n\text{Al}))$  is the intensity of the NMR signal attributed to the  $\text{Si}(n\text{Al})$  units.<sup>1</sup> The spectrum was recorded on a Bruker Avance II 300 MHz spectrometer.

The Si/Al molar ratios of deduced from <sup>29</sup>Si MAS NMR spectra are in good agreement with Si/Al molar ratio determined from XRD and XRF data's (see <sup>29</sup>Si MAS NMR spectrum and deconvolution below).

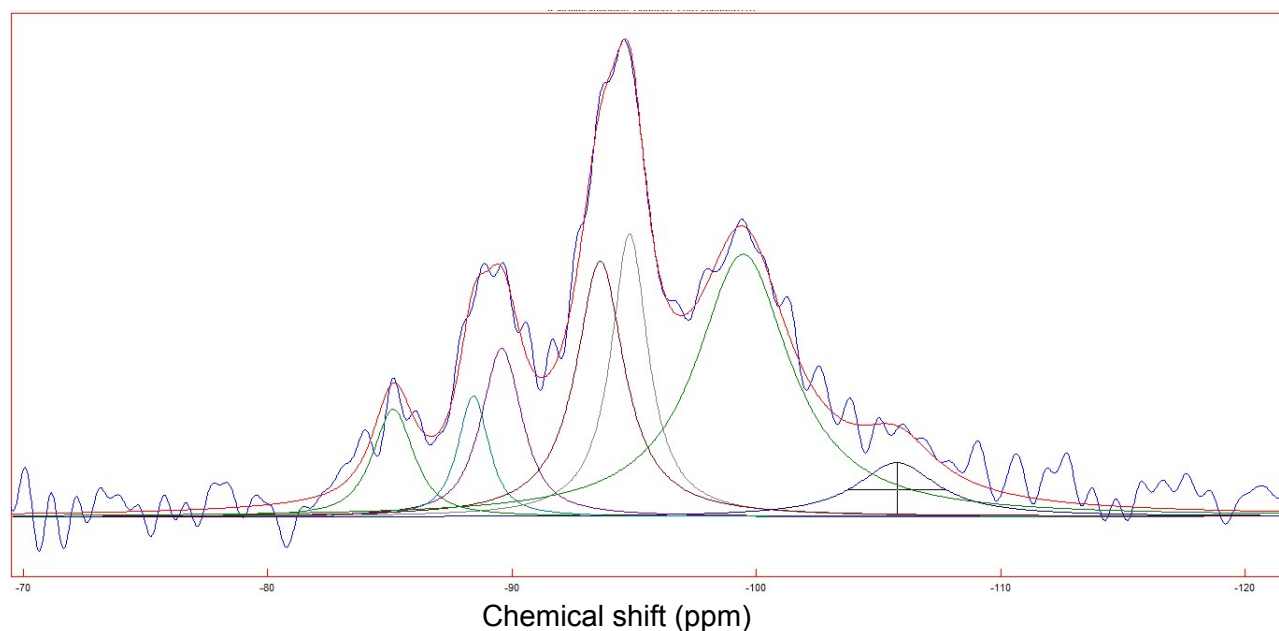

Figure S2. <sup>29</sup>Si MAS NMR spectrum with deconvolution of the sample obtained from starting gels with the following molar compositions: 9.4 SiO<sub>2</sub>: 0.2 Al<sub>2</sub>O<sub>3</sub>: 4.95 Na<sub>2</sub>O: 180 H<sub>2</sub>O.

---

1- Engelhardt, G.; Lohse, U.; Lippmaa, E.; Tarmak, M.; Mägi, M. *Z. Anorg. Allg. Chem.* **1981**, 482, 49–64.

---
